# ANESTHESIOLOGY

Trusted Evidence: Discovery to Practice™

The Journal of the American Society of Anesthesiologists, Inc. [anesthesiology.org](http://anesthesiology.org)

Mission: Promoting scientific discovery and knowledge in perioperative, critical care, and pain medicine to advance patient care.

## EDITOR-IN-CHIEF

**Evan D. Kharasch, M.D., Ph.D.**  
Editor-in-Chief, ANESTHESIOLOGY  
Department of Anesthesiology  
Duke University  
Durham, North Carolina  
Tel: 1-800-260-5631  
E-mail: [editorial-office@anesthesiology.org](mailto:editorial-office@anesthesiology.org)

## PAST EDITORS-IN-CHIEF

**Henry S. Ruth, M.D.**, 1940–1955  
**Ralph M. Tovell, M.D.**, 1956–1958  
**James E. Eckenhoff, M.D.**, 1959–1962  
**Leroy D. Vandam, M.D.**, 1963–1970  
**Arthur S. Keats, M.D.**, 1971–1973  
**Nicholas M. Greene, M.D.**, 1974–1976  
**C. Philip Larson, Jr., M.D.**, 1977–1979  
**John D. Michenfelder, M.D.**, 1980–1985  
**Lawrence J. Saidman, M.D.**, 1986–1996  
**Michael M. Todd, M.D.**, 1997–2006  
**James C. Eisenach, M.D.**, 2007–2016

## COVER ART

**James P. Rathmell, M.D.**, Boston, Massachusetts  
**Annemarie B. Johnson, C.M.I.**  
Medical Illustrator, Winston-Salem, North Carolina  
**Sara M. Jarret, M.F.A., C.M.I.**  
Medical Illustrator, North Wales, Pennsylvania

For reprint inquiries and purchases, please contact  
[reprintsolutions@wolterskluwer.com](mailto:reprintsolutions@wolterskluwer.com) in North America, and  
[healthlicensing@wolterskluwer.com](mailto:healthlicensing@wolterskluwer.com) for rest of world.

Anesthesiology is abstracted or indexed in Index Medicus/MEDLINE, Science Citation Index/SciSearch, Current Contents/Clinical Medicine, Current Contents/Life Sciences, Reference Update, EMBASE/Excerpta Medica, Biological Abstracts (BIOSIS), Chemical Abstracts, Hospital Literature Index, and Comprehensive Index to Nursing and Allied Health Literature (CINAHL).

The affiliations, areas of expertise, and conflict-of-interest disclosure statements for each Editor and Associate Editor can be found on the Journal's Web site ([www.anesthesiology.org](http://www.anesthesiology.org)).

## CME EDITORS

**Leslie C. Jameson, M.D.**  
**Dan J. Kopacz, M.D.**

## EDITORIAL OFFICE

**Vicki Tedeschi**, Managing Editor  
E-mail: [managing-editor@anesthesiology.org](mailto:managing-editor@anesthesiology.org)  
**Stephen Cavanaugh**, Peer Review Supervisor  
**Ashley Freeland**  
**Karen Parks**  
**Cheryl Sullivan**  
ANESTHESIOLOGY Journal  
1061 American Lane  
Schaumburg, IL 60173-4973  
Tel: 1-800-260-5631  
E-mail: [editorial-office@anesthesiology.org](mailto:editorial-office@anesthesiology.org)

## WOLTERS KLUWER HEALTH PUBLICATION STAFF

**Miranda Walker**, Publisher  
**Sara Cleary**, Senior Journal Production Editor/Team Leader  
**Emily Moore**, Journal Production Editor  
**Colette Lind**, Journal Production Associate  
**Hilary Druker**, Advertising Field Sales Representative

## ASA OFFICERS

**Linda J. Mason, M.D.**, President  
**Mary Dale Peterson, M.D.**, President-Elect  
**James D. Grant, M.D., M.B.A.**, Immediate Past President  
**Beverly K. Philip, M.D.**, First Vice-President

All articles accepted for publication are done so with the understanding that they are contributed exclusively to this Journal and become the property of the American Society of Anesthesiologists, Inc. Statements or opinions expressed in the Journal reflect the views of the author(s) and do not represent official policy of the American Society of Anesthesiologists unless so stated.

# ANESTHESIOLOGY

Trusted Evidence: Discovery to Practice™

The Journal of the American Society of Anesthesiologists, Inc. [anesthesiology.org](http://anesthesiology.org)

Mission: Promoting scientific discovery and knowledge in perioperative, critical care, and pain medicine to advance patient care.

## EDITOR-IN-CHIEF

**Evan D. Kharasch**, M.D., Ph.D., Durham, North Carolina

## ASSISTANT EDITOR-IN-CHIEF

**Michael J. Avram**, Ph.D., Chicago, Illinois

## EXECUTIVE EDITORS

**Deborah J. Culley**, M.D., Boston, Massachusetts

**Brian P. Kavanagh**,\* M.B., F.R.C.P.C., Toronto, Canada

**Jerrold H. Levy**, M.D., F.A.H.A., F.C.C.M., Durham,  
North Carolina

**James P. Rathmell**, M.D., Boston, Massachusetts

## EDITORS

**J. David Clark**, M.D., Ph.D., Palo Alto, California

**Andrew Davidson**, M.B.B.S., M.D., F.A.N.Z.C.A.,  
Victoria, Australia

**Amanda A. Fox**, M.D., M.P.H., Dallas, Texas

**Yandong Jiang**, M.D., Ph.D., Houston, Texas

**Sachin Kheterpal**, M.D., M.B.A., Ann Arbor, Michigan

**Martin J. London**, M.D., San Francisco, California

**George A. Mashour**, M.D., Ph.D., Ann Arbor, Michigan

**Daniel I. Sessler**, M.D., Cleveland, Ohio

**Laszlo Vutskits**, M.D., Geneva, Switzerland

## STATISTICAL EDITOR

**Timothy T. Houle**, Ph.D., Boston, Massachusetts

## ASSOCIATE EDITORS

**Takashi Asai**, M.D., Ph.D., Osaka, Japan

**Brian Thomas Bateman**, M.D., Boston, Massachusetts

**George S. Bause**, M.D., M.P.H., Cleveland, Ohio

**Beatrice Beck-Schimmer**, M.D., Zurich, Switzerland

**James M. Blum**, M.D., F.C.C.M., Atlanta, Georgia

**Chad Michael Brummett**, M.D., Ann Arbor, Michigan

**John Butterworth**, M.D., Richmond, Virginia

**Vincent W. S. Chan**, M.D., F.R.C.P.C., F.R.C.A., Toronto, Canada

**Steven P. Cohen**, M.D., Baltimore, Maryland

**Albert Dahan**, M.D., Ph.D., Leiden, The Netherlands

**Douglas Eleveld**, M.D., Groningen, The Netherlands

**Holger K. Eltzschig**, M.D., Ph.D., Houston, Texas

**Charles W. Emala, Sr.**, M.D., M.S., New York, New York

**David Faraoni**, M.D., Ph.D., F.C.C.P., F.A.H.A., Toronto, Canada

**Jorge A. Galvez**, M.D., Philadelphia, Pennsylvania

**Laurent Gance**, M.D., Rochester, New York

**Stephen T. Harvey**, M.D., Nashville, Tennessee

**Harriet W. Hopf**, M.D., Salt Lake City, Utah

**Vesna Jevtovic-Todorovic**, M.D., Ph.D., M.B.A., Aurora,  
Colorado

**Ru-Rong Ji**, Ph.D., Durham, North Carolina

**Cor J. Kalkman**, M.D., Utrecht, The Netherlands

**Meghan Lane-Fall**, M.D., M.H.S.P., Philadelphia, Pennsylvania

**Adam B. Lerner**, M.D., Boston, Massachusetts

**Kate Leslie**, M.B.B.S., M.D., M.Epi., F.A.N.Z.C.A., Parkville,  
Australia

**Jochen D. Muehlschlegel**, M.D., M.M.Sc., Boston,  
Massachusetts

**Paul S. Myles**, M.B., B.S., M.P.H., M.D., F.F.A.R.C.S.I.,  
F.A.N.Z.C.A., Melbourne, Australia

**Peter Nagele**, M.D., M.Sc., Chicago, Illinois

**Mark D. Neuman**, M.D., M.Sc., Philadelphia, Pennsylvania

**Craig Palmer**, M.D., Tucson, Arizona

**Cyril Rivat**, M.D., Montpellier, France

**Jeffrey Sall**, M.D., Ph.D., San Francisco, California

**Warren S. Sandberg**, M.D., Ph.D., Nashville, Tennessee

**Alan Jay Schwartz**, M.D., M.S.Ed., Philadelphia, Pennsylvania

**Allan F. Simpao**, M.D., Philadelphia, Pennsylvania

**Nikolaos J. Skubas**, M.D., Cleveland, Ohio

**Jamie W. Sleigh**, M.D., Hamilton, New Zealand

**Ken Solt**, M.D., Boston, Massachusetts

**Michel Struys**, M.D., Groningen, The Netherlands

**Eric Sun**, M.D., Ph.D., Palo Alto, California

**BobbieJean Sweitzer**, M.D., F.A.C.P., Chicago, Illinois

**Marcos F. Vidal Melo**, M.D., Ph.D., Boston, Massachusetts

**David S. Warner**, M.D., Durham, North Carolina

**Duminda N. Wijeyesundera**, M.D., Ph.D., F.R.C.P.C.,  
Toronto, Canada

**Hannah Wunsch**, M.D., M.Sc., Toronto, Canada

\*Deceased.
